# Supplementary material for: The role of geographic bias in knowledge diffusion: a systematic review and narrative synthesis
Source: Res Integr Peer Rev. 2020 Jan 15;5:2. doi: 10.1186/s41073-019-0088-0 (PMC6961296; doi:10.1186/s41073-019-0088-0)
Supplement: Supplementary file 1 — Additional file 1. Detailed risk of bias assessment. Description of data: A more detailed discussion of the risk of bias assessment of the included studies, which resulted in the abbreviated version seen in Fig. 5. [file 41073_2019_88_MOESM1_ESM.xlsx]

## Sheet: RoB Assessment
Author	Year	Title	Citation	Sequence Generation		Allocation Concealment		Blinding		Incomplete outcome data		Selective outcome reporting		Other potential threats to validity
				Description	Review author's judgement	Description	Review author's judgement	Description	Review author's judgement	Description	Review author's judgement	Description	Review author's judgement	Description	Review author's judgement
Christakis	2000	Do physicians judge a study by its cover? An investigation of journal attribution bias	Christakis DA, Saint S, Saha S, Elmore JG, Welsh DE, Baker P, et al. Do physicians judge a study by its cover? An investigation of journal attribution bias. J Clin Epidemiol. 2000;53(8):773–8.	A factorial design was used; hence questionnaires protrayed every permutation of attributed or unattributed article and abstract. Accordingly, there were 2^2 x 2^2 or 16 different questionnaires constructed and randomly distributed to participants. The sampling frame and stud design are presented in Figure 1.	UNCLEAR; this was probably done, as authors refer to a "random distribution," but they do not explain how this random sequence was generated.	This is not discussed in the methodolgy section.	UNCLEAR; By nature of the experiment, it is unlikely that participants could have foreseen their assignments. Nonetheless, the cover letter that was sent with the questionnaires, which stated "we are examining how physicians use information from the medical literature to guide their clinical practice," could have served to alert participants that they were under scrutiny for an experiment, which …	The questionnaire included a cover letter which stated that "we are examining how physicians use information from the medical literature to guide their clinical practice." This vague phraseology was intentionally chose so as to avoid making the intention of the study transparent. ... All articles and abstracts were re-typed into the same font as the rest of the questionnaire to guard against the …	YES; blinding of key study participants and personnel ensure, and unlikely that blinding could have been broken	Of 416 questionnaires distributed in the initial mailing, thirteen were returned by physicians with no forwarding address and four were returned by physicians reporting that they no longer practiced medicine or were retired. Of the 399 eligible participants, 264* returned questionnaires (response rate 66%). *Review author's note: The numbers in Figure 1 add up to 263, not 264 as claimed by the st…	NO; according to Figure 1, the missing outcome data is not evenly balanced among the groups (ranges from 81% returned to 50% returned), there seems to be a higher response rate when the article was attributed.	To gauge their impressions of the articles and abstracts and their effects on respondents' practice, participants were asked to respond to the following five statements after each article or abstract using a five-point Likert measure…To maximize our power to detect an effect of journal attribution bias, the numeric responses to these five questions were summed to create an overall "impression sco…	YES; All outcomes were clearly pre-specified in the methods section (overall impression scores; predictor variables) and were reported.	It is possible, though we believe unlikely, that respondents could have unblinded the study by either recognizing the unattributed articles and abstracts based on their content or by undertaking a MEDLINE search in order to find them based on the details they contained. Should this have occurred, it would have biased our findings towards the null and hence decreased our ability to detect the effe…	NO; The authors mention several additional sources of bias, but do not discuss how they attempted to address them. Their conclusion "these limitation prohibit us from concluding that journal attribution bias does not exist," impacts the validity of the study.
Harris	2017	Explicit bias toward high-income-country research: a randomized, blinded, crossover experiment of English clinicians	Harris M, Marti J, Watt H, Bhatti Y, Macinko Jand Darzi AW. Explicit Bias Toward High-Income-Country Research: A Randomized, Blinded, Crossover Experiment Of English Clinicians. Health affairs. 2017; 36 (11): 1997-2004. Available from: doi: 10.1377/hlthaff.2017.0773 Available from: https://doi.org/10.1377/hlthaff.2017.0773 .	Repondents were randomized to groups A1 or B1 or to C1 or D1; to avoid possible order effect, the order in which the abstracts were presented in the survey was randomized for each participant. The survey platform used simple randomization occurring in real time as the respondent entered the survey, so that the respondent was unaware that any randomization had taken place. The survey types (A1, B1…	YES; investigator describe a detailed randomization component in their study design.	The survey platform used simple randomization occurring in real time as the respondent entered the survey, so that the respondent was unaware that any randomization had taken place; The survey types (A1, B1, C1 or D1) to which respondents were randomized in wave 1 dictated the survey type that they subsequently received in wave 2 (A2, B2, C2 or D2) one month later.	YES; investigators made an effort to ensure that allocation was concealed adquately, and that participants could not foresee assignment into their respective intervention group.	So that the purpose of the study did not influence the responses, the survey was described as a speed-reading survey, and we requested respondents to complete the reading and rating of each abstract as quickly and carefully as possible, to enhance anchoring and fast thinking. We assessed the success of the blinding by asking respondents, at the conclusion of the second survey, whether they had no…	YES; blinding of key study participants and personnel ensure, and unlikely that blinding could have been broken; a sensitivity analysis which excluded the three repondents who indicated they may have noticed the change in source did not change the results	We obtained 551 complete responses at baseline (wave 1). Of those, 63.0% completed the survey at follow-up approximately thirty days later (mean: 28.3; 95% CI: 28.0-28.7), resulting in a longitudinal sample of 347 complete responses. (only including people that completed both waves, so 0% attrition)	YES; due to nature of the study (cross-over), there is no possibility for attrition.	Each abstract was accompanied by the same three questions. First, how strong is the evidence presented in this abstract? Second, how relevant to you is the research presented in this abstract? Third, how likely ar eyou to recommend this abstract to a colleague? Responses were on a scale of 0-100, with 0 as not at all strong, relevant, or likely, and 100 as extremely strong, relevant or likely.	YES; All outcomes are clearly pre-specified in the methods section (review scores for strength, relevance and likelihood to recommend to a colleague) and were reported.	First is the potential for selection bias in an online survey, which could affect the respresentativeness of the findings but only if participation in the survey is associated with bias against low-income countries. We addressed this issue by blinding the participants to the purpose of the study. Second, the specific definitions of strength of evidence, relevance, and referral to a peer may be pe…	YES; authors identified several additional sources of bias, and outlined how these were addressed where appropriate.
Tomkins	2017	Reviewer bias in single- versus double-blind peer review	Tomkins A., Zhang M., Heavlin W.D. Reviewer bias in single- versus double-blind peer review. Proc Natl Acad Sci U S A. 2017;114(48):12708–13.	Program committee (PC) split randomly into two groups of equal size: single-blind PC (SBPC) and double-blind PC (DBPC)	UNCLEAR; was probably done, as randomization is referenced, but does not explain how randomization was performed	This is not discussed in the methodolgy section.	NO; By nature of the experiment, it is unlikely that participants could have foreseen their assignments. However, the call for papers that was sent stated "As an experiment this year, WSDM 2017 will use a combination of single-blind revieweing and double-blind reviewing. Please contact the PC chairs at the address below for any questions on the submission or review process." This could have alert…	This is not discussed in the methology section. Supplementary materials mentions the wording in the call for papers as, "As an experiment this year, WSDM 2017 will use a combination of single-blind revieweing and double-blind reviewing. Please contact the PC chairs at the address below for any questions on the submission or review process."	NO; blinding to the purpose of the study was seemingly attempted through the vague description in the call for papers. However, as mentioned in the discussion, it is likely/possible that PC members could have unblinded themselves through discussion with other PC members, and by looking for author information themselves.	We allocate exactly two double-blind ad two single-blind reviewers to each paper, from a total pool of 974 double-blind and 983 single-blind reviewers. Due to some midstream withdrawals, the number of papers in consideration at the end of the experiment is exactly 500, of these 453 papers have four reviews, and 47 have two reviews due to reviwer dereliction.	UNCLEAR; while nearly all 500 papers received the anticipated 4 reviews (two from SBPC and two from DBPC), 47 did not. However, the authors do not mention how those 47 missing reviews were split among SBPC and DBPC, so it is difficult to discern how this may bias the results.	Covariates for Implicit Bias Analysis included Academic paper; Female author; Paper from the Unites States; Famous author; Same country as reviewer; Top university; and Top companies.	NO; All the covariates for Implicit Bias Analysis are included in the tables for review score and bid prediction (Tables 2 and 3, respectively). The authors also discuss the lengths of reviews, distribution of review scores and ranks assigned across the single-blind and double-blind conditions. They also track how review scores change during the discussion of submission, once the experiment has c…	We study the behavior of the PC with respect to bidding and scoring papers only. After these steps are complete, the SPC member conducts some discussion among reviewers, and the program chairs make a final decision. While Results suggest there may not be significant changes specifically in how reviewers modify their scores during discussion, it is nonetheless possible that during these stages, th…	UNCLEAR; it is unclear whether there are additional elements to this study, beyond the obvious ones discussed, that could introduct further bias.
